# Supplementary material for: NAAC (v1.0): A Seamless Two-Decade Cross-Scale Simulation from the North American Atlantic Coast to Tidal Wetlands Using the 3D Unstructured-grid Model SCHISM (v5.11.0)
Source: Copernicus journal article supplement (doi:10.5194/egusphere-2025-593), 2025-06-04
Supplement: Supplementary file 1 [file egusphere-2025-593-supplement.pdf]

**NAAC (v1.0): A Seamless Two-Decade Cross-Scale Simulation from the North American Atlantic Coast to Tidal Wetlands Using the 3D Unstructured-grid Model SCHISM (v5.11.0)**

Xun Cai<sup>1</sup>, Qubin Qin<sup>2</sup>, Linlin Cui<sup>3</sup>, Xiucheng Yang<sup>4</sup>, Y. Joseph Zhang<sup>5</sup>, Jian Shen<sup>5</sup>

<sup>1</sup>School of the Environment, Yale University, New Haven, CT, 06511, USA

<sup>2</sup>Coastal Studies Institute, East Carolina University, Wanchese, NC, 27981, USA

<sup>3</sup>Lynker and NOAA/NWS/NCEP/EMC, Leesburg, VA, 20176, USA

<sup>4</sup>Department of Natural Resources and the Environment, University of Connecticut, Storrs, CT, 06229, USA

<sup>5</sup>Virginia Institute of Marine Science, William & Mary, Gloucester Point, VA, 23062, USA

*Correspondence to:* Xun Cai (xun.cai@yale.edu)

**Contents of this file**

Figures S1 to S4

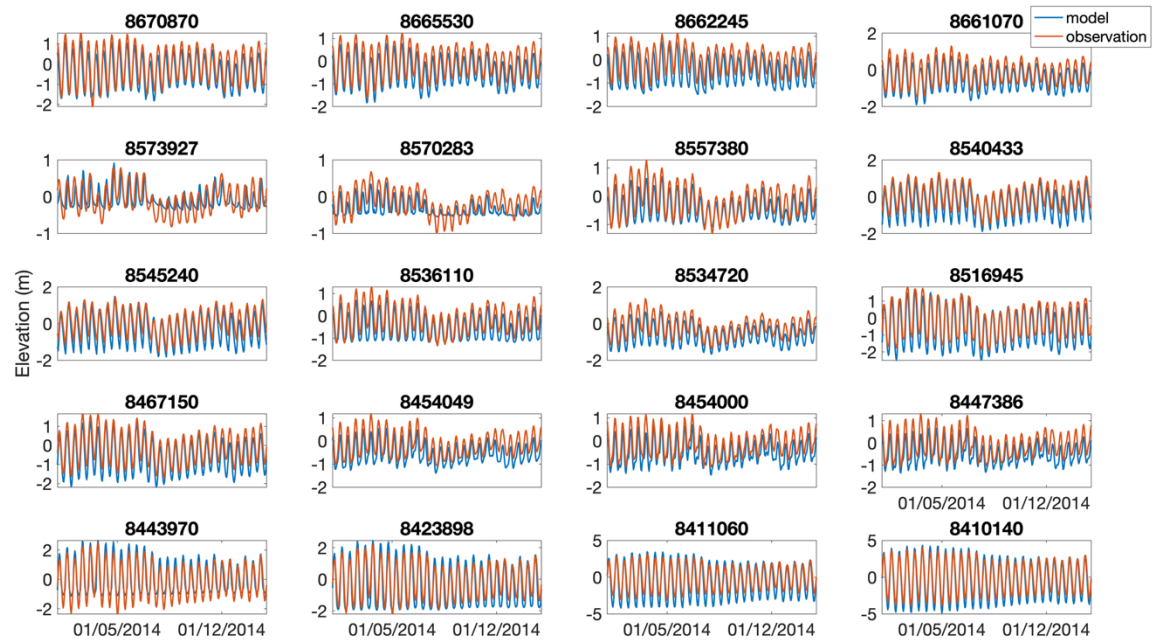

**Figure S1.** Time series comparison of simulated elevation with continuous observations at NOAA-COOPS.

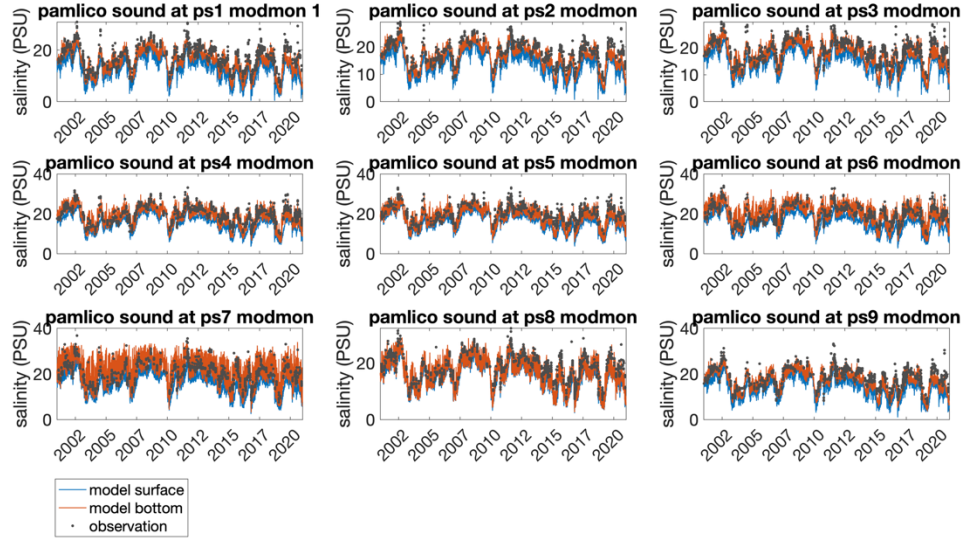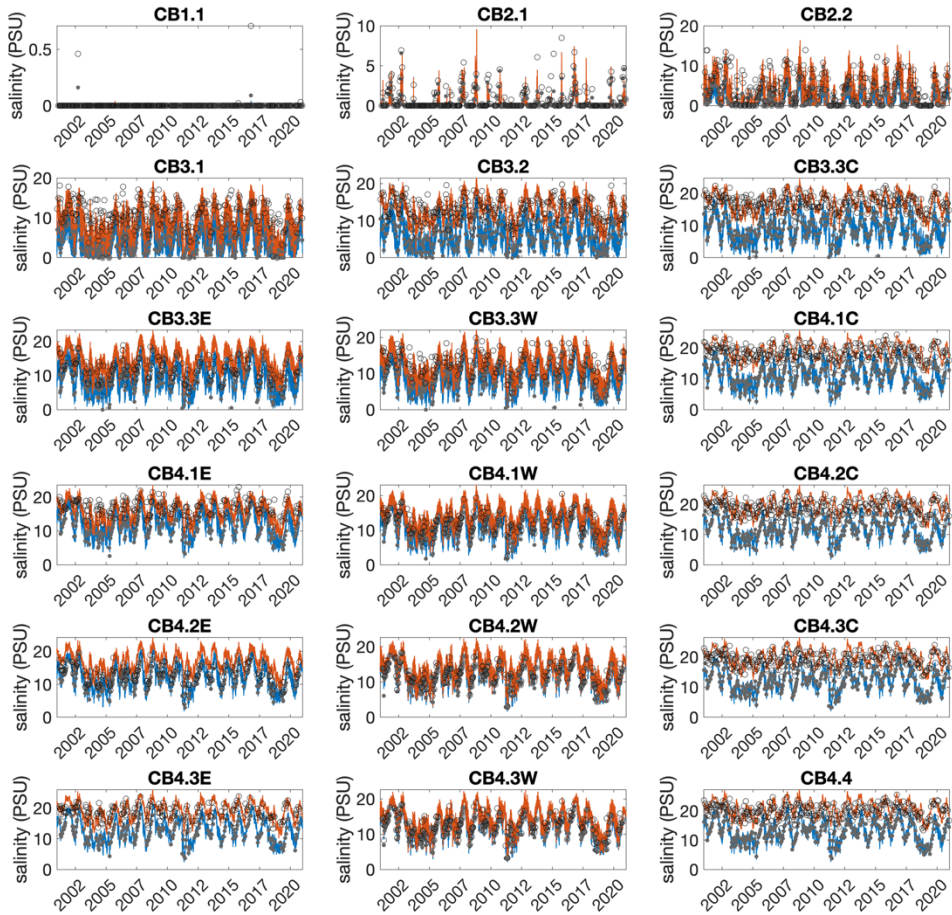

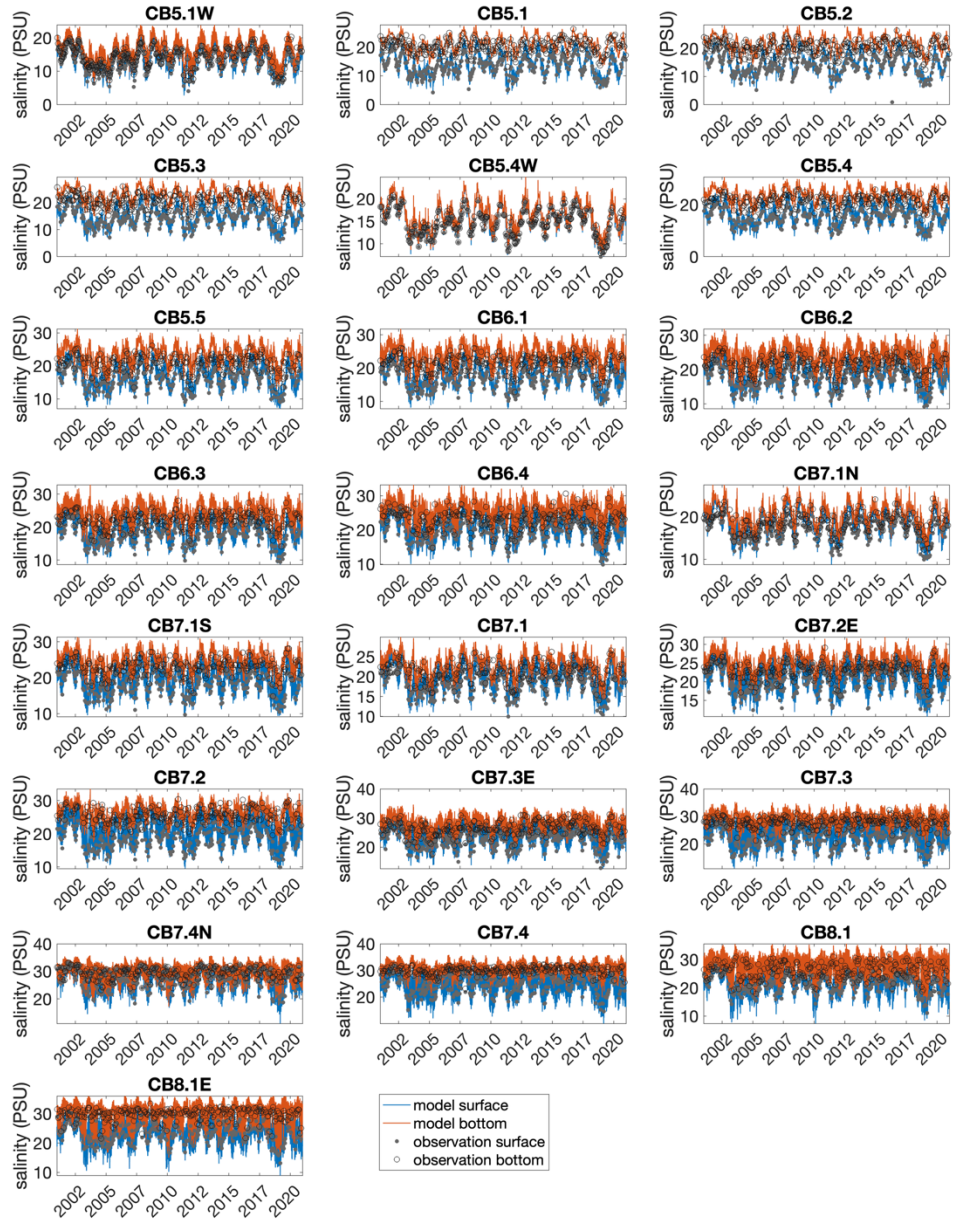

**Figure S2.** Time series comparison of simulated salinity with continuous observations at APES and CBP.



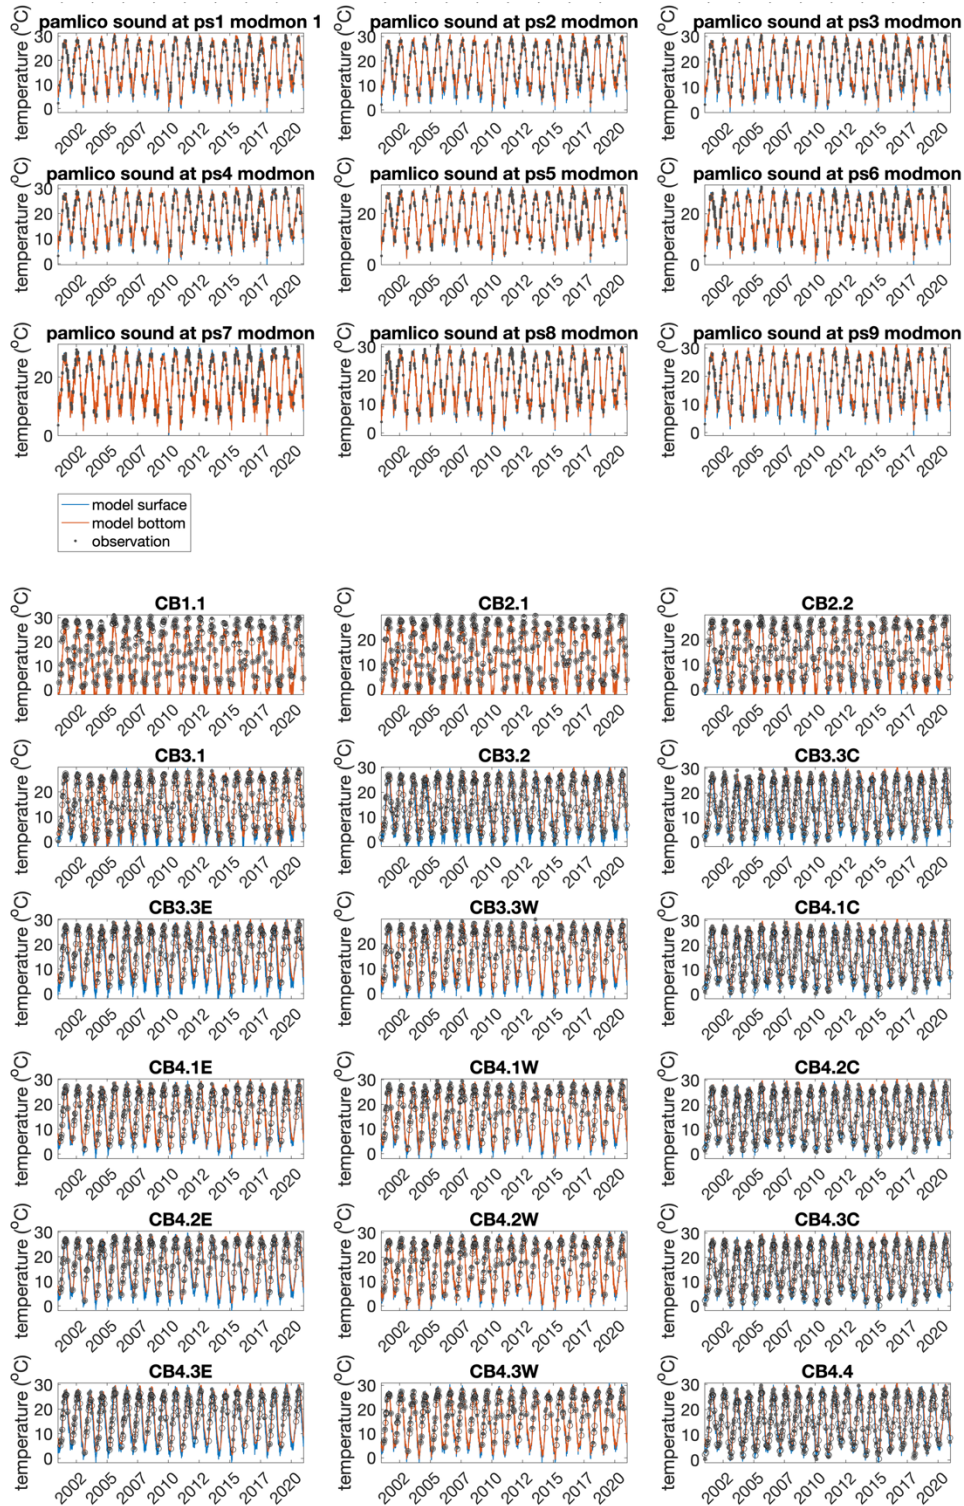

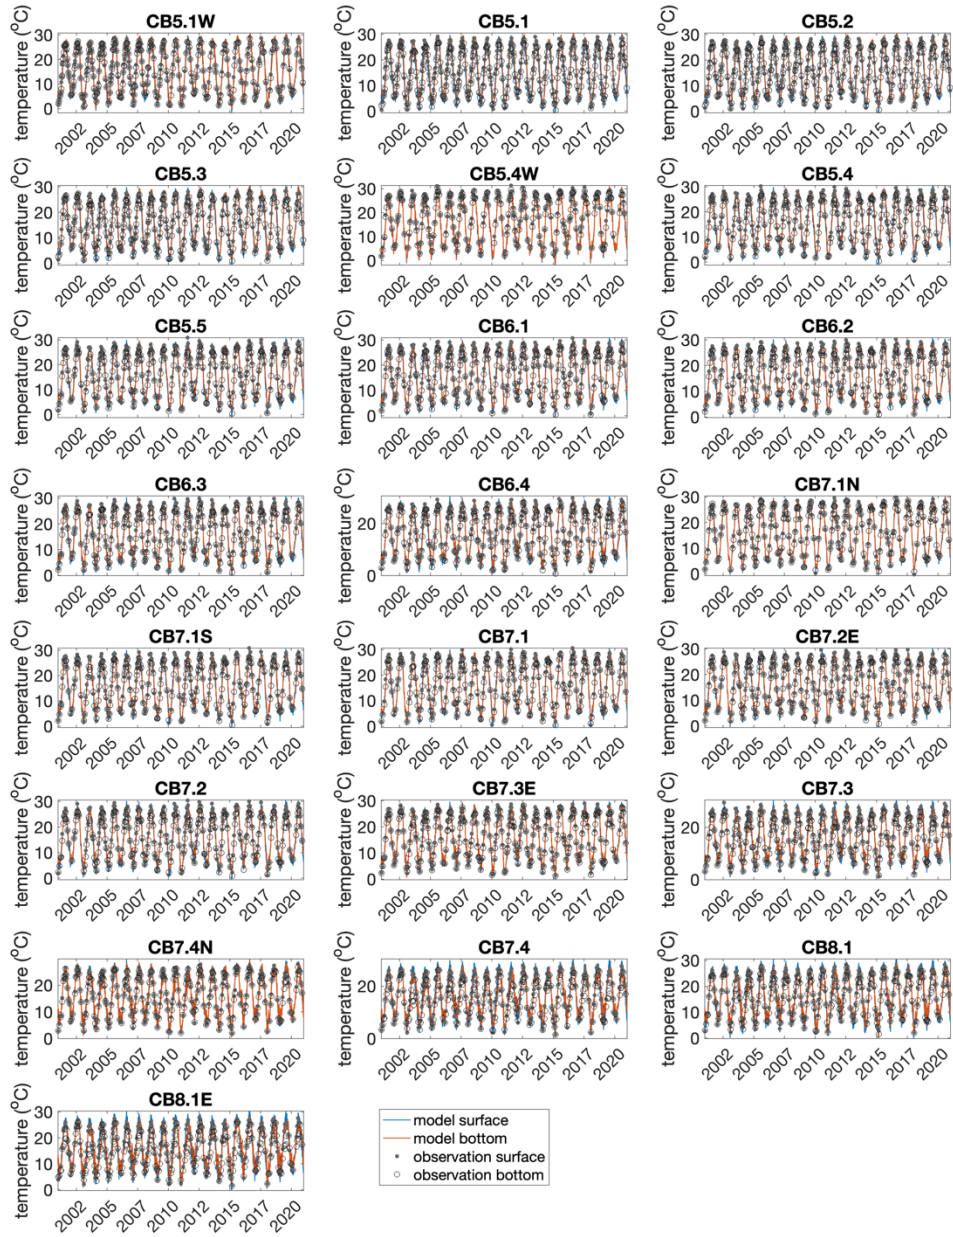

**Figure S3.** Time series comparison of simulated temperature with continuous observations at APES and CBP.

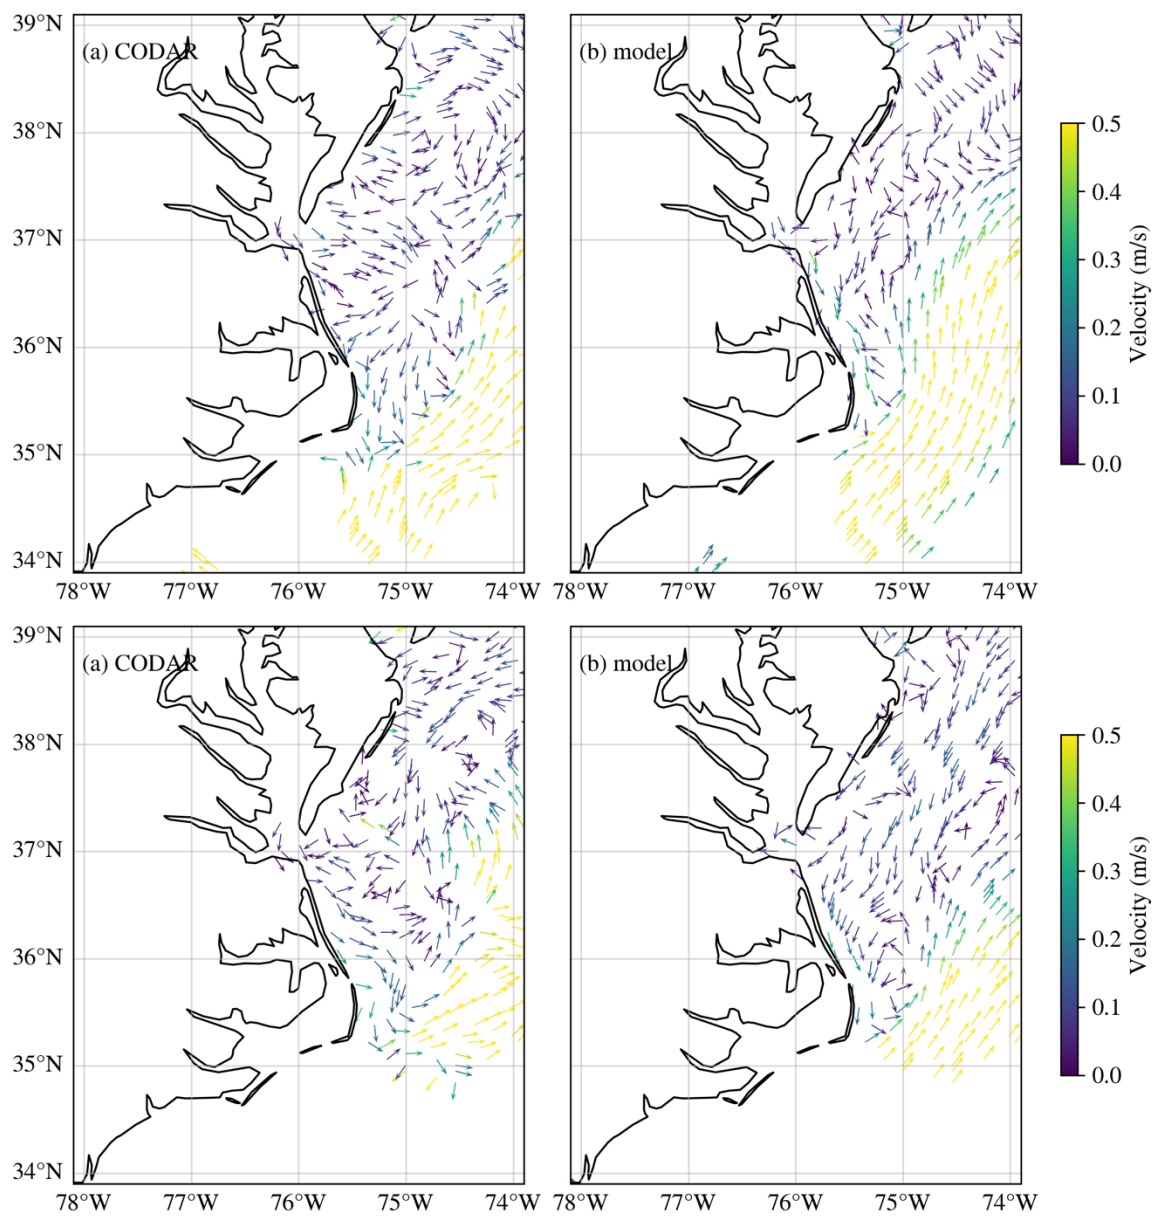



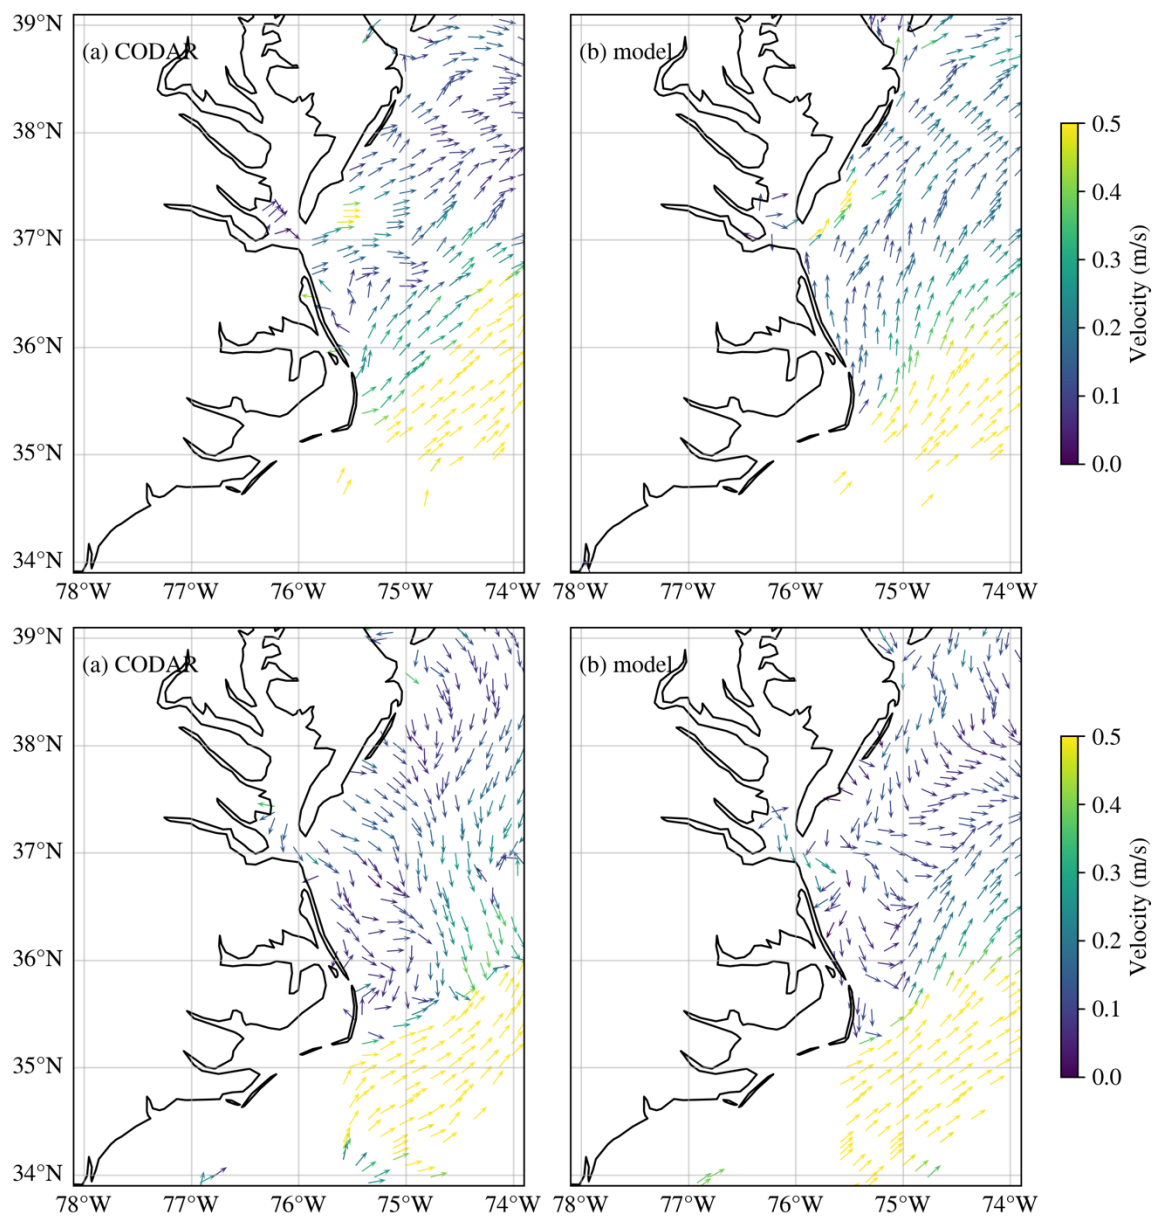

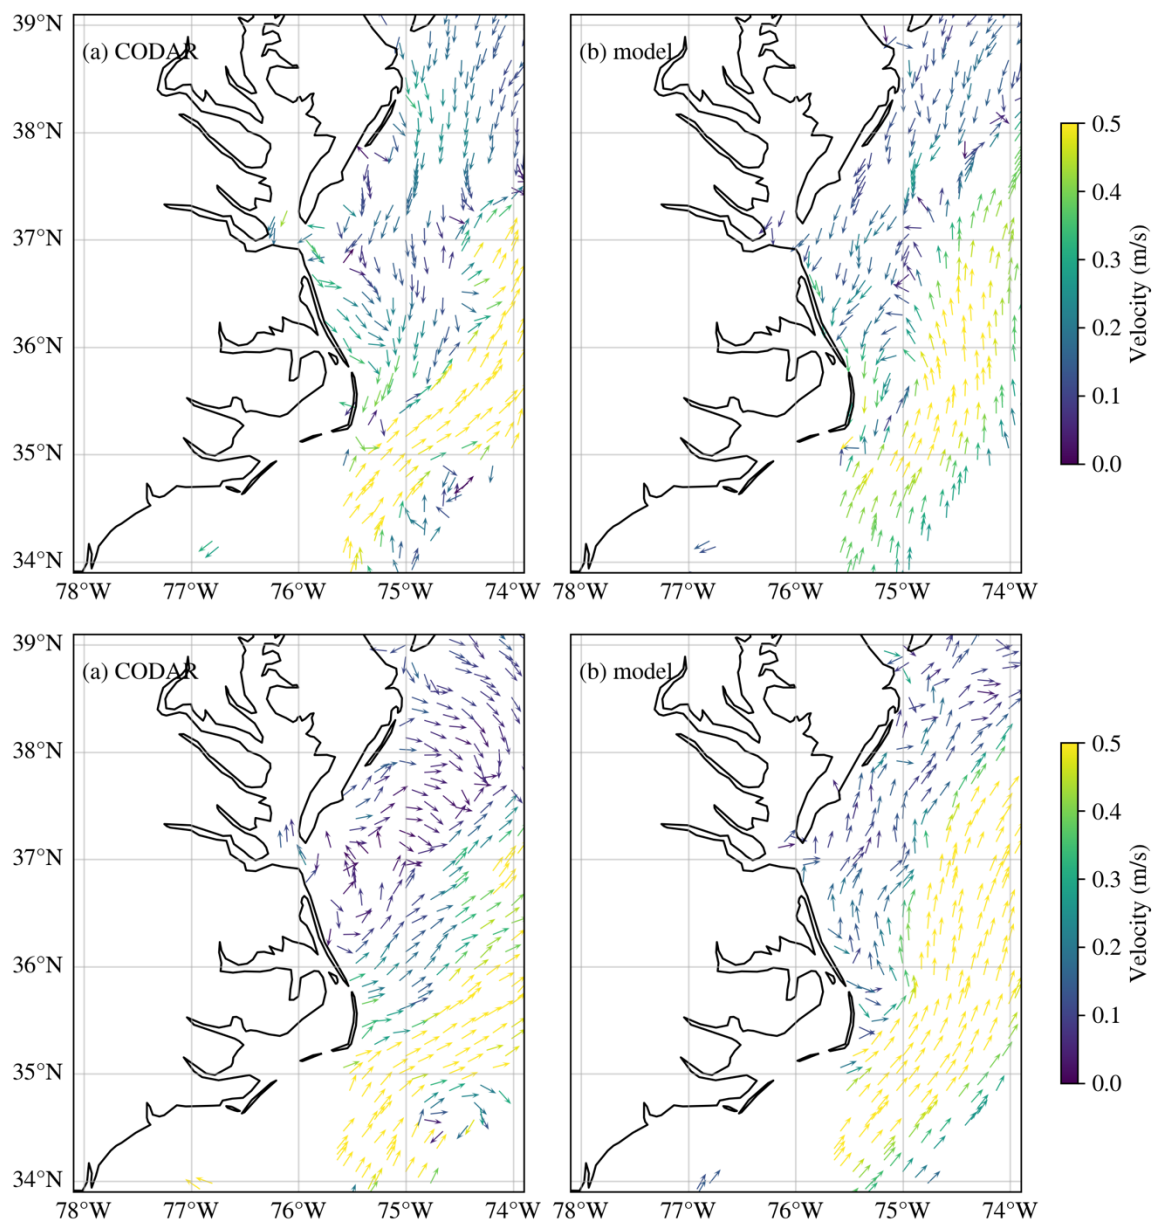

**Figure S4.** Time series comparison of simulated temperature with continuous observations at APES and CBP. Daily averaged surface currents over the Mid-Atlantic coast from (a) CODAR observations and (b) model outputs on the 10th and 30th (28th for February) of February, July, and August 2015.
